# Supplementary material for: Nanocurcumin is superior to native curcumin in preventing degenerative changes in Experimental Cerebral Malaria
Source: PubMed Central journal article supplement (PMC5577147; doi:10.1038/s41598-017-10672-9), 2017-08-30
Supplement: 41598_2017_10672_MOESM1_ESM.pdf [file 41598_2017_10672_MOESM1_ESM.pdf]

## **Supplementary Information**

### **Nanocurcumin is superior to native curcumin in preventing degenerative changes in Experimental Cerebral Malaria**

**Chaitanya Dende<sup>1</sup>, Jairam Meena<sup>2</sup>, Perumal Nagarajan<sup>2</sup>, Viswanathan Arun Nagaraj<sup>3</sup>, Amulya Kumar Panda<sup>2\*</sup> and Govindarajan Padmanaban<sup>1\*</sup>**

<sup>1</sup>Department of Biochemistry, Indian Institute of Science, Bengaluru - 560012, India.

<sup>2</sup>National Institute of Immunology, New Delhi - 110067, India.

<sup>3</sup>Infectious Disease Biology, Institute of Life Sciences, Bhubaneswar - 751023, India.

\* amulya@nii.ac.in (A.K.P.); geepee@biochem.iisc.ernet.in (G.P.)

**Supplementary Table S1. (C) PLGA-curcumin nanoparticles size, load and entrapment efficiency.**

| Formulation                 | Size (nm)        | Zeta potential (mV) | PDI  | Load ( $\mu\text{g}/\text{mg}$ ) | E E (%) |
|-----------------------------|------------------|---------------------|------|----------------------------------|---------|
| PLGA dummy nanoparticles    | $382.4 \pm 12.6$ | $-11.2 \pm 2.1$     | 0.26 | -                                | -       |
| PLGA-curcumin nanoparticles | $495 \pm 14.4$   | $-13.8 \pm 1.8$     | 0.24 | 65                               | 37.91   |

**Supplementary Table S2. Primers used in qPCR reactions.**

| <i>Gene</i>                     | <i>Gene sequence</i>                                                                                 |
|---------------------------------|------------------------------------------------------------------------------------------------------|
| <i>CXCR3</i>                    | <i>Forward 5' AATGCCACCCATTGCCAGTAC 3'</i><br><i>Reverse 5' AGCAGTAGGCCATGACCAGAAG 3'</i>            |
| <i>CXCL9</i>                    | <i>Forward 5' GCCATGAAGTCCGCTGTTCT 3'</i><br><i>Reverse 5' GGGTTCCTCGAACTCCACACT</i>                 |
| <i>CXCL10</i>                   | <i>Forward 5' GACGGTCCGCTGCAACTG 3'</i><br><i>Reverse 5' GCTTCCCTATGGCCCTCATT 3'</i>                 |
| <i>TNF<math>\alpha</math></i>   | <i>Forward 5' AAGCCTGTAGCCCACGTCGTA3'</i><br><i>Reverse 5' GGCACCACTAGTTGGTTGTCTTTG 3'</i>           |
| <i>IFN<math>\gamma</math></i>   | <i>Forward 5' TCAAGTGGCATAGATGTGGAAGAA</i><br><i>Reverse 5' TGGCTCTGCAGGATTTTCATG 3'</i>             |
| <i>ICAM-1</i>                   | <i>Forward 5' GCCTCCGGACTTTCGATCTT 3'</i><br><i>Reverse 5' GTCAGGGGTGTCGAGCTTTG 3'</i>               |
| <i>CD8<math>\beta</math></i>    | <i>Forward 5' GCTGGTAGTCTGCATCCTGCTTC 3'</i><br><i>Reverse 5' TTGCTAGCAGGCTATCAGTCTTGTG 3'</i>       |
| <i>18S rRNA P. berghei ANKA</i> | <i>Forward 5' AAGCATTAATAAAGCGAATACATCCTTAC 3'</i><br><i>Reverse 5' GGAGATTGGTTTTGACGTTTATGTG 3'</i> |
| <i>Granzyme B</i>               | <i>Forward 5' CTCCTGCTACTGCTGAC 3'</i><br><i>Reverse 5' GTCAGCACAAAGTCCTCTC 3'</i>                   |

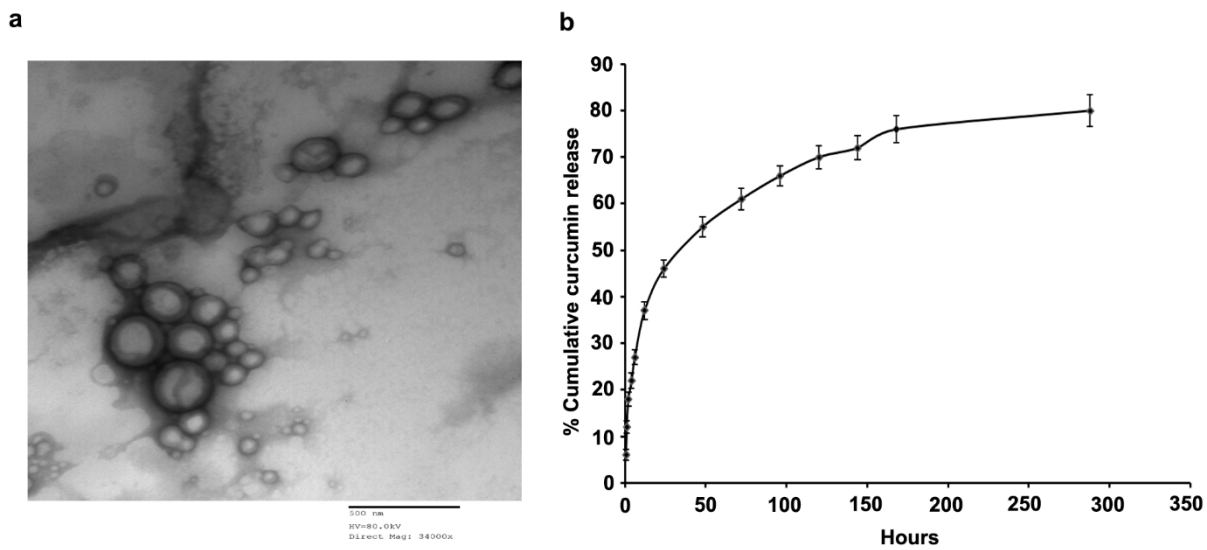

**Figure S1.** Characterization of PLGA-curcumin nanoparticles (a) TEM images of PLGA nanoparticles entrapping curcumin. The average size of particle is around 260 nm. (b) *In vitro* cumulative release of curcumin from PLGA nanoparticles.

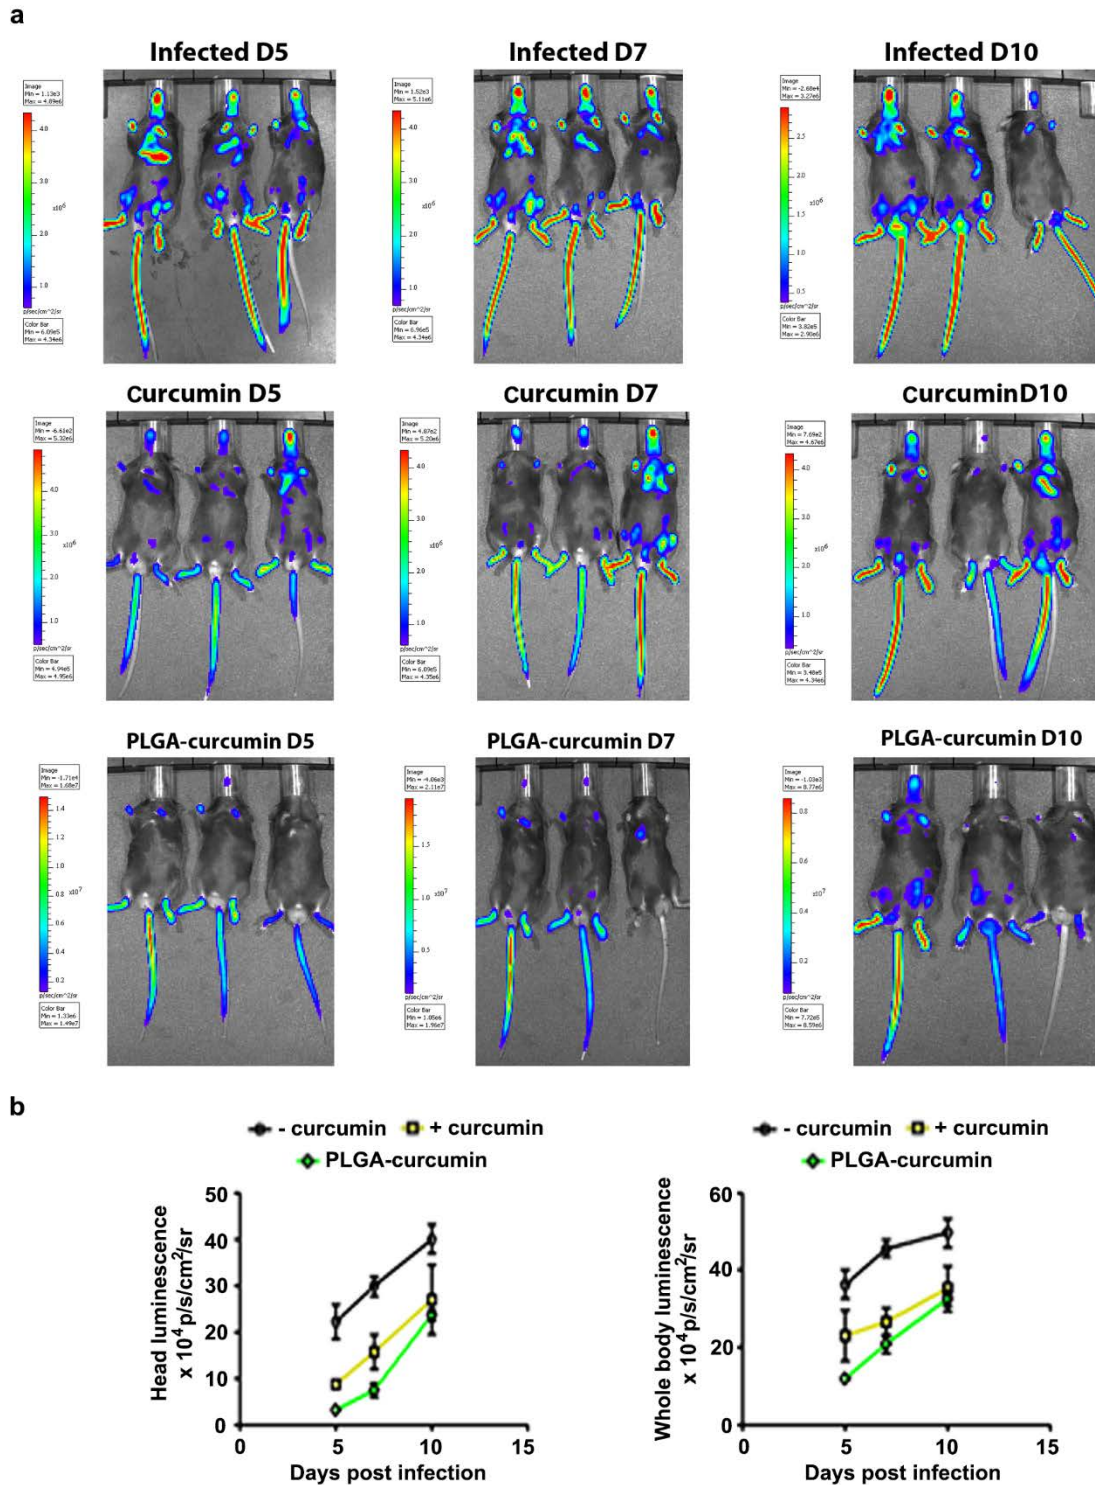

**Figure S2.** Quantification of bioluminescence. (a) Whole body bioluminescent images of untreated (- curcumin), native curcumin (+ curcumin) and PLGA-curcumin treated mice infected with *P. berghei*-ANKA transgenic parasites expressing luciferase. (b) Quantification of head and

whole body luminescence. The bioluminescence images were taken for three animals on days 5, 7 and 10. The animals were given three oral doses of native curcumin (5 mg) or PLGA-curcumin (5 mg, providing 350  $\mu$ g of curcumin), starting on 3 d.p.i. The data given in the top two rows were published earlier<sup>13</sup> and are included here for comparison. Native curcumin and PLGA-curcumin data were generated in the same experiment.

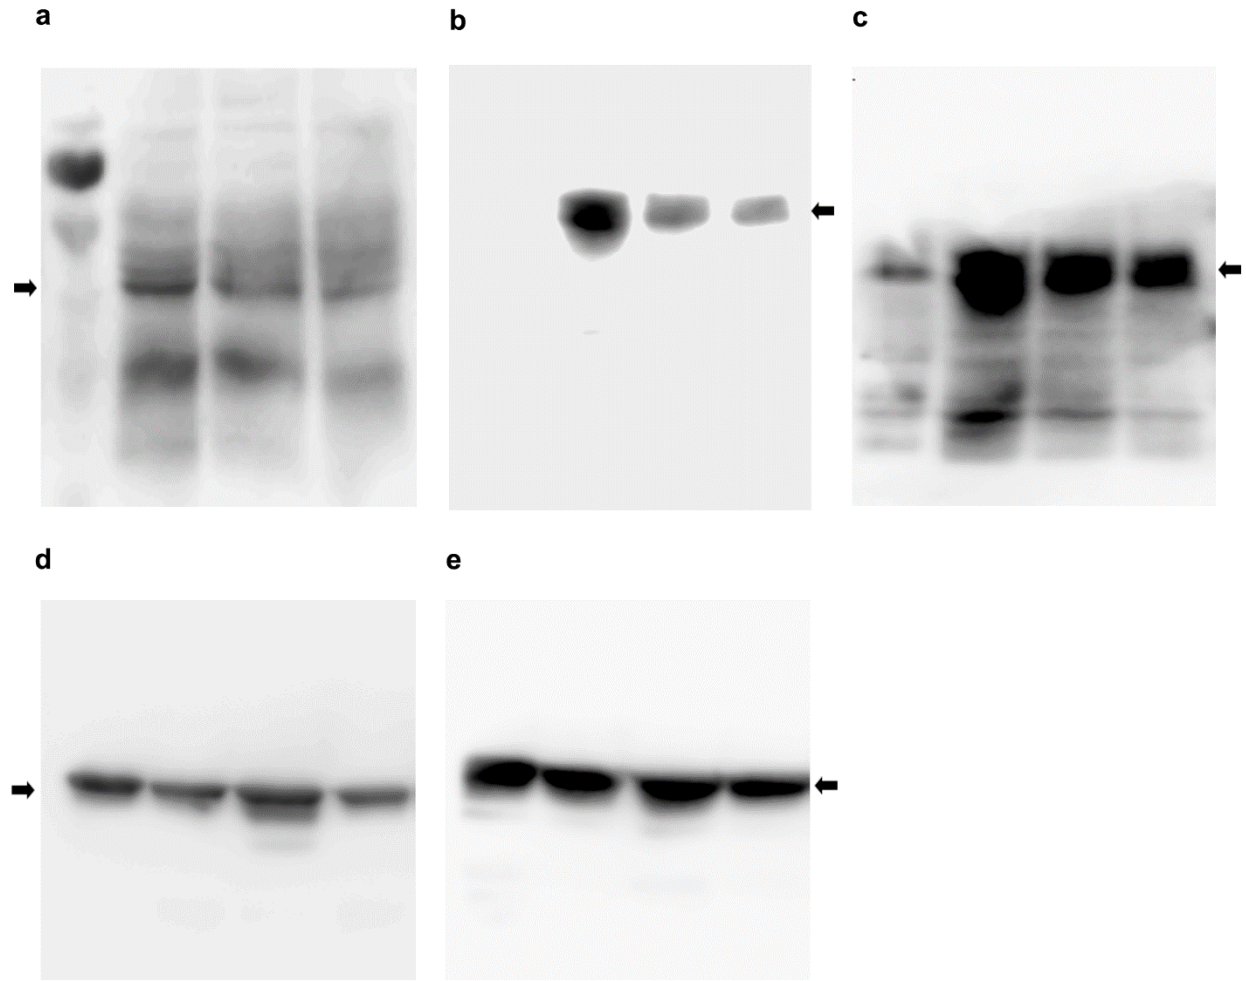

**Figure S3.** Whole blot images of Figure 4. (a) Whole blot image of brain phospho-NF- $\kappa$ B. (b) Whole blot image of spleen phospho-NF- $\kappa$ B (short exposure). (c) Whole blot image of spleen phospho-NF- $\kappa$ B (long exposure). (d) Whole blot image of brain  $\beta$ -actin used as control. (e) Whole blot image of spleen  $\beta$ -actin used as control. Arrows represent the protein bands given in Figure 4.
